# Supplementary material for: Temperature-/solvent-dependent low-dimensional compounds based on quinoline-2,3-dicarboxylic acid: Structures and fluorescent properties
Source: Royal Society of Chemistry journal article supplement (doi:10.1039/c2dt31243c), 2012-01-01

# Temperature-/Solvent-Dependent Low-dimensional Compounds Based on Quinoline-2,3-dicarboxylic Acid: Structures and Fluorescent Properties

Ming-Fang Wang,<sup>a</sup> Xu-Jia Hong,<sup>a</sup> Qing-Guang Zhan,<sup>a</sup> Yi-Ting Liu,<sup>a</sup> Hong-Guang Jin,<sup>a</sup>  
Zhi-Peng Zheng,<sup>a</sup> Shi-Hai Xu<sup>b</sup> and Yue-Peng Cai,<sup>\*a</sup>

<sup>a</sup>*School of Chemistry and Environment, South China Normal University; Key Laboratory of the energy conversion and energy storage materials,, Guangzhou 510006, P. R. China. Fax: 86-020-39310; Tel: 86-020-39310383;*

*E-mail: [caiyyp@scnu.edu.cn](mailto:caiyyp@scnu.edu.cn)*

<sup>b</sup>*Department of Chemistry, Jinan University, Guangzhou 510632. E-mail: [txush@jnu.edu.cn](mailto:txush@jnu.edu.cn)*

## Contents

1. Table S1 Crystal data and structure refinement of eight compounds **1-6** and **8-9**.
2. Table S2 The selected bond lengths and angles for compounds **1-6** and **8-9**.
3. Table S3 Distances (Å) and angles (°) of hydrogen bonds for compounds **1-6** and **8-9**.
4. Figure S1 The thermal analyses (N2) of the crystalline **1-4** (TG curves).
5. Figure S2 X-ray powder diffraction patterns of simulated (*a*) and as prepared complex (*b*) for compounds **1, 2, 3** and **9**.

Table S1

|                                                                           | 1                                                                 | 2                                                                | 3                                                                 | 4                                                                 |
|---------------------------------------------------------------------------|-------------------------------------------------------------------|------------------------------------------------------------------|-------------------------------------------------------------------|-------------------------------------------------------------------|
| Chemical formula                                                          | C <sub>22</sub> H <sub>16</sub> N <sub>2</sub> O <sub>10</sub> Co | C <sub>20</sub> H <sub>12</sub> N <sub>2</sub> O <sub>4</sub> Co | C <sub>26</sub> H <sub>24</sub> N <sub>2</sub> O <sub>10</sub> Co | C <sub>22</sub> H <sub>16</sub> N <sub>2</sub> O <sub>10</sub> Zn |
| <i>M</i>                                                                  | 527.30                                                            | 403.25                                                           | 583.40                                                            | 533.76                                                            |
| Crystal system                                                            | Triclinic                                                         | Monoclinic                                                       | Monoclinic                                                        | Triclinic                                                         |
| Space group                                                               | <i>P</i> -1                                                       | <i>C</i> 2/ <i>c</i>                                             | <i>P</i> 2(1)/ <i>c</i>                                           | <i>P</i> -1                                                       |
| <i>a</i> / Å                                                              | 7.3968(14)                                                        | 28.867(4)                                                        | 13.090(5)                                                         | 7.4062(17)                                                        |
| <i>b</i> / Å                                                              | 9.1349(18)                                                        | 8.0358(12)                                                       | 7.694(3)                                                          | 9.136(2)                                                          |
| <i>c</i> / Å                                                              | 9.410(3)                                                          | 15.211(2)                                                        | 12.632(5)                                                         | 9.415(3)                                                          |
| $\alpha$ / °                                                              | 110.547(4)                                                        | 90                                                               | 90                                                                | 110.466(4)                                                        |
| $\beta$ / °                                                               | 98.240(4)                                                         | 114.151(2)                                                       | 97.422(6)                                                         | 98.320(4)                                                         |
| $\gamma$ / °                                                              | 111.630(2)                                                        | 90                                                               | 90                                                                | 111.664(3)                                                        |
| <i>V</i> / Å <sup>3</sup>                                                 | 525.6(2)                                                          | 3219.7(8)                                                        | 1261.6(8)                                                         | 526.6(2)                                                          |
| <i>Z</i>                                                                  | 1                                                                 | 8                                                                | 2                                                                 | 1                                                                 |
| <i>T</i> / K                                                              | 298(2)                                                            | 298(2)                                                           | 298(2)                                                            | 298(2)                                                            |
| <i>F</i> (000)                                                            | 269                                                               | 1640                                                             | 602                                                               | 272                                                               |
| <i>D</i> <sub>calcd</sub> / g cm <sup>-3</sup>                            | 1.666                                                             | 1.664                                                            | 1.536                                                             | 1.683                                                             |
| $\mu$ / mm <sup>-1</sup>                                                  | 0.882                                                             | 1.097                                                            | 0.743                                                             | 1.232                                                             |
| $\lambda$ / Å                                                             | 0.71073                                                           | 0.71073                                                          | 0.71073                                                           | 0.71073                                                           |
| <i>R</i> <sub>int</sub>                                                   | 0.0410                                                            | 0.0436                                                           | 0.0792                                                            | 0.0250                                                            |
| data/restraint/parm                                                       | 2735/0/161                                                        | 2890 / 0 / 244                                                   | 2270 / 0 / 183                                                    | 1861 / 3 / 165                                                    |
| GOF                                                                       | 1.062                                                             | 1.041                                                            | 1.011                                                             | 1.044                                                             |
| <i>R</i> <sub>1</sub> [ <i>I</i> = 2 $\sigma$ ( <i>I</i> )] <sup>a</sup>  | 0.0645                                                            | 0.0388                                                           | 0.0571                                                            | 0.0544                                                            |
| <i>wR</i> <sub>2</sub> [ <i>I</i> = 2 $\sigma$ ( <i>I</i> )] <sup>b</sup> | 0.1143                                                            | 0.0827                                                           | 0.0985                                                            | 0.1362                                                            |

<sup>a</sup>  $R_1 = \Sigma ||F_o| - |F_c|| / \Sigma |F_o|$ , <sup>b</sup>  $wR_2 = [\Sigma w(F_o^2 - F_c^2)^2 / \Sigma w(F_o^2)^2]^{1/2}$ , where  $w = 1 / [\sigma^2(F_o^2) + (aP)_2 + bP]$ .  $P = (F_o^2 + 2F_c^2) / 3$ .

|                                                                  | <b>5</b>                                                         | <b>6</b>                                                          | <b>8</b>                                                         | <b>9</b>                                            |
|------------------------------------------------------------------|------------------------------------------------------------------|-------------------------------------------------------------------|------------------------------------------------------------------|-----------------------------------------------------|
| Chemical formula                                                 | C <sub>20</sub> H <sub>12</sub> N <sub>2</sub> O <sub>4</sub> Zn | C <sub>26</sub> H <sub>24</sub> N <sub>2</sub> O <sub>10</sub> Zn | C <sub>20</sub> H <sub>12</sub> N <sub>2</sub> O <sub>4</sub> Cd | C <sub>12</sub> H <sub>8</sub> NO <sub>4</sub> ClCd |
| <i>M</i>                                                         | 409.69                                                           | 589.84                                                            | 456.72                                                           | 378.04                                              |
| Crystal system                                                   | Monoclinic                                                       | Monoclinic                                                        | Monoclinic                                                       | Monoclinic                                          |
| Space group                                                      | <i>C2/c</i>                                                      | <i>P2(1)/c</i>                                                    | <i>C2/c</i>                                                      | <i>C2/c</i>                                         |
| <i>a</i> /Å                                                      | 29.004(9)                                                        | 12.984(8)                                                         | 28.777(8)                                                        | 15.433(9)                                           |
| <i>b</i> /Å                                                      | 8.040(3)                                                         | 7.731(5)                                                          | 8.059(2)                                                         | 18.004(10)                                          |
| <i>c</i> /Å                                                      | 15.251(5)                                                        | 12.571(8)                                                         | 15.281(4)                                                        | 9.215(5)                                            |
| <i>α</i> /°                                                      | 90                                                               | 90                                                                | 90                                                               | 90                                                  |
| <i>β</i> /°                                                      | 114.337(4)                                                       | 97.320(7)                                                         | 114.007(4)                                                       | 91.158(8)                                           |
| <i>γ</i> /°                                                      | 90                                                               | 90                                                                | 90                                                               | 90                                                  |
| <i>V</i> /Å <sup>3</sup>                                         | 3240.3(18)                                                       | 1251.7(13)                                                        | 3237.4(15)                                                       | 2560(2)                                             |
| <i>Z</i>                                                         | 8                                                                | 2                                                                 | 8                                                                | 8                                                   |
| <i>T</i> /K                                                      | 298 (2)                                                          | 298(2)                                                            | 298(2)                                                           | 298(2)                                              |
| <i>F</i> (000)                                                   | 1664                                                             | 608                                                               | 1808                                                             | 1472                                                |
| <i>D</i> <sub>calcd</sub> / g cm <sup>-3</sup>                   | 1.680                                                            | 1.565                                                             | 1.874                                                            | 1.962                                               |
| <i>μ</i> /mm <sup>-1</sup>                                       | 1.547                                                            | 1.045                                                             | 1.381                                                            | 1.922                                               |
| <i>λ</i> /Å                                                      | 0.71073                                                          | 0.71073                                                           | 0.71073                                                          | 0.71073                                             |
| <i>R</i> <sub>int</sub>                                          | 0.0872                                                           | 0.0705                                                            | 0.0646                                                           | 0.1551                                              |
| data/restraint/parm                                              | 2921 / 0 / 244                                                   | 2248 / 0 / 163                                                    | 2918 / 24 / 244                                                  | 2312 / 0 / 174                                      |
| GOF                                                              | 1.043                                                            | 1.093                                                             | 1.062                                                            | 0.953                                               |
| <i>R</i> <sub>1</sub> [ <i>I</i> = 2σ( <i>I</i> )] <sup>a</sup>  | 0.0555                                                           | 0.0677                                                            | 0.0657                                                           | 0.0788                                              |
| <i>wR</i> <sub>2</sub> [ <i>I</i> = 2σ( <i>I</i> )] <sup>b</sup> | 0.1109                                                           | 0.1368                                                            | 0.1512                                                           | 0.1047                                              |

<sup>a</sup>  $R_1 = \Sigma ||F_o| - |F_c|| / \Sigma |F_o|$ , <sup>b</sup>  $wR_2 = [\Sigma w(F_o^2 - F_c^2)^2 / \Sigma w(F_o^2)^2]^{1/2}$ , where  $w = 1 / [\sigma^2(F_o^2) + (aP)_2 + bP]$ .  $P = (F_o^2 + 2F_c^2) / 3$ .

**Table S2.** Bond lengths (Å) and angles (°) for complexes **1-6** and **8-9**

| Complex 1           |            |                     |            |
|---------------------|------------|---------------------|------------|
| Co(1)-O(2)#1        | 2.027(3)   | Co(1)-O(3)#1        | 2.093(3)   |
| Co(1)-O(2)          | 2.027(3)   | Co(1)-N(1)#1        | 2.228(4)   |
| Co(1)-O(3)          | 2.093(3)   | Co(1)-N(1)          | 2.228(4)   |
| O(2)#1-Co(1)-O(2)   | 180.00(14) | O(3)-Co(1)-N(1)#1   | 88.96(14)  |
| O(2)#1-Co(1)-O(3)   | 90.32(14)  | O(3)#1-Co(1)-N(1)#1 | 91.04(14)  |
| O(2)-Co(1)-O(3)     | 89.68(14)  | O(2)#1-Co(1)-N(1)   | 105.35(14) |
| O(2)#1-Co(1)-O(3)#1 | 89.68(14)  | O(2)-Co(1)-N(1)     | 74.65(14)  |
| O(2)-Co(1)-O(3)#1   | 90.32(14)  | O(3)-Co(1)-N(1)     | 91.04(14)  |
| O(2)#1-Co(1)-N(1)#1 | 74.65(14)  | O(3)#1-Co(1)-N(1)   | 88.96(14)  |
| O(2)-Co(1)-N(1)#1   | 105.35(14) |                     |            |
| Complex 2           |            |                     |            |
| Co(1)-O(3)          | 1.936(2)   | O(3)-Co(1)-N(1)     | 101.08(10) |
| Co(1)-O(2)#2        | 1.977(2)   | O(2)#2-Co(1)-N(1)   | 100.07(9)  |
| Co(1)-N(1)          | 2.085(2)   | O(3)-Co(1)-N(2)#3   | 108.68(10) |
| Co(1)-N(2)#3        | 2.103(2)   | O(2)#2-Co(1)-N(2)#3 | 100.19(9)  |
| O(3)-Co(1)-O(2)#2   | 139.90(10) | N(1)-Co(1)-N(2)#3   | 100.91(9)  |
| Complex 3           |            |                     |            |
| Co(1)-O(1)#4        | 2.008(3)   | Co(1)-O(3)          | 2.125(4)   |
| Co(1)-O(1)          | 2.008(3)   | Co(1)-N(1)          | 2.218(4)   |
| Co(1)-O(3)#4        | 2.125(4)   | Co(1)-N(1)#4        | 2.218(4)   |
| O(1)#4-Co(1)-O(1)   | 180.0      | O(3)#4-Co(1)-N(1)   | 91.62(14)  |
| O(1)#4-Co(1)-O(3)#4 | 89.00(16)  | O(3)-Co(1)-N(1)     | 88.38(14)  |
| O(1)-Co(1)-O(3)#4   | 91.00(16)  | O(1)#4-Co(1)-N(1)#4 | 79.01(13)  |
| O(1)#4-Co(1)-O(3)   | 91.00(16)  | O(1)-Co(1)-N(1)#4   | 100.99(13) |
| O(1)-Co(1)-O(3)     | 89.00(16)  | O(3)#4-Co(1)-N(1)#4 | 88.38(14)  |
| O(1)#4-Co(1)-N(1)   | 100.99(13) | O(3)-Co(1)-N(1)#4   | 91.62(14)  |
| O(1)-Co(1)-N(1)     | 79.01(13)  | O(3)#4-Co(1)-N(1)   | 91.62(14)  |
| Complex 4           |            |                     |            |
| Zn(1)-O(2)#1        | 2.031(3)   | Zn(1)-O(3)          | 2.093(3)   |

|                     |            |                     |            |
|---------------------|------------|---------------------|------------|
| Zn(1)-O(2)          | 2.031(3)   | Zn(1)-N(1)#1        | 2.221(3)   |
| Zn(1)-O(3)#1        | 2.093(3)   | Zn(1)-N(1)          | 2.221(3)   |
| O(2)#1-Zn(1)-O(3)#1 | 89.76(14)  | O(3)#1-Zn(1)-N(1)#1 | 90.74(13)  |
| O(2)-Zn(1)-O(3)#1   | 90.24(14)  | O(3)-Zn(1)-N(1)#1   | 89.26(13)  |
| O(2)#1-Zn(1)-O(3)   | 90.24(14)  | O(2)#1-Zn(1)-N(1)   | 104.76(13) |
| O(2)-Zn(1)-O(3)     | 89.76(14)  | O(2)-Zn(1)-N(1)     | 75.24(13)  |
| O(3)#1-Zn(1)-O(3)   | 180.00(9)  | O(3)#1-Zn(1)-N(1)   | 89.26(13)  |
| O(2)#1-Zn(1)-N(1)#1 | 75.24(13)  | O(3)-Zn(1)-N(1)     | 90.74(13)  |
| O(2)-Zn(1)-N(1)#1   | 104.76(13) |                     |            |
| <b>Complex 5</b>    |            |                     |            |
| Zn(1)-O(2)#2        | 1.920(4)   | Zn(1)-N(2)          | 2.101(4)   |
| Zn(1)-O(4)#3        | 1.958(4)   | Zn(1)-N(1)          | 2.103(4)   |
| O(2)#2-Zn(1)-O(4)#3 | 138.55(18) | O(2)#2-Zn(1)-N(1)   | 110.13(17) |
| O(2)#2-Zn(1)-N(2)   | 100.16(17) | O(4)#3-Zn(1)-N(1)   | 100.53(17) |
| O(4)#3-Zn(1)-N(2)   | 100.54(17) | N(2)-Zn(1)-N(1)     | 101.11(18) |
| <b>Complex 6</b>    |            |                     |            |
| N(1)-Zn(1)          | 2.171(2)   | Zn(1)-O(3)#4        | 2.101(3)   |
| Zn(1)-O(1)#4        | 2.000(3)   | Zn(1)-O(3)          | 2.101(3)   |
| Zn(1)-O(1)          | 2.000(3)   | Zn(1)-N(1)#4        | 2.171(2)   |
| O(1)#4-Zn(1)-N(1)   | 99.69(9)   | O(3)#4-Zn(1)-N(1)   | 91.72(10)  |
| O(1)-Zn(1)-N(1)     | 80.31(9)   | O(3)-Zn(1)-N(1)     | 88.28(10)  |
| O(1)-Zn(1)-O(3)#4   | 91.74(13)  | O(1)-Zn(1)-N(1)#4   | 99.69(16)  |
| O(1)#4-Zn(1)-O(3)   | 91.74(13)  | O(3)#4-Zn(1)-N(1)#4 | 88.28(19)  |
| O(1)-Zn(1)-O(3)     | 88.26(13)  | O(3)-Zn(1)-N(1)#4   | 91.72(19)  |
| <b>Complex 8</b>    |            |                     |            |
| Cd(1)-O(4)#2        | 1.939(7)   | N(2)-Cd(1)-O(2)#3   | 91.1(3)    |
| Cd(1)-O(1)#3        | 1.992(7)   | N(1)-Cd(1)-O(2)#3   | 153.9(3)   |
| Cd(1)-N(2)          | 2.136(7)   | O(4)#2-Cd(1)-C(3)#3 | 122.6(3)   |
| Cd(1)-N(1)          | 2.153(7)   | O(1)#3-Cd(1)-C(3)#3 | 29.0(3)    |
| Cd(1)-O(2)#3        | 2.582(7)   | N(2)-Cd(1)-C(3)#3   | 94.9(3)    |
| N(2)-Cd(1)-N(1)     | 99.4(3)    | N(1)-Cd(1)-C(13)#2  | 95.8(3)    |

|                     |           |                      |           |
|---------------------|-----------|----------------------|-----------|
| O(4)#2-Cd(1)-O(2)#3 | 99.4(3)   | O(2)#3-Cd(1)-C(13)#2 | 94.0(3)   |
| O(1)#3-Cd(1)-O(2)#3 | 56.1(3)   | N(2)-Cd(1)-O(2)#3    | 91.1(3)   |
| <b>Complex 9</b>    |           |                      |           |
| Cd(1)-O(4)          | 2.300(11) | Cd(1)-O(4)#5         | 2.472(11) |
| Cd(1)-O(3)#5        | 2.373(11) | Cd(1)-Cl(1)          | 2.519(4)  |
| Cd(1)-N(1)          | 2.395(8)  | Cd(1)-Cl(1)#6        | 2.581(4)  |
| O(4)-Cd(1)-O(3)#5   | 98.8(4)   | O(3)#5-Cd(1)-Cl(1)#6 | 88.9(3)   |
| O(4)-Cd(1)-N(1)     | 72.2(4)   | N(1)-Cd(1)-Cl(1)#6   | 164.3(4)  |
| O(3)#5-Cd(1)-N(1)   | 87.6(3)   | O(4)#5-Cd(1)-Cl(1)#6 | 96.0(3)   |
| O(4)-Cd(1)-O(4)#5   | 151.2(5)  | Cl(1)-Cd(1)-Cl(1)#6  | 91.08(14) |
| O(3)#5-Cd(1)-O(4)#5 | 54.2(4)   | O(4)-Cd(1)-C(7)#5    | 126.0(5)  |
| N(1)-Cd(1)-O(4)#5   | 94.4(4)   | O(3)#5-Cd(1)-C(7)#5  | 27.7(4)   |
| O(4)-Cd(1)-Cl(1)    | 106.0(3)  | N(1)-Cd(1)-C(7)#5    | 91.5(4)   |
| O(3)#5-Cd(1)-Cl(1)  | 155.1(3)  | O(4)#5-Cd(1)-C(7)#5  | 26.5(4)   |
| N(1)-Cd(1)-Cl(1)    | 98.5(2)   | Cl(1)-Cd(1)-C(7)#5   | 127.5(5)  |
| O(4)#5-Cd(1)-Cl(1)  | 101.1(3)  | Cl(1)#6-Cd(1)-C(7)#5 | 92.6(4)   |
| O(4)-Cd(1)-Cl(1)#6  | 93.3(3)   |                      |           |

\*Symmetry transformations used to generate equivalent atoms: #1 -x+1,-y,-z+1; #2 x,-y+1,z+1/2; #3 x,y-1,z; #4 -x+1,-y+1,-z+1; #5 x,-y,z-1/2; #6 -x,-y,-z+1.

Table S3 Distances (Å) and angles (°) of hydrogen bonds for compounds **1-6** and **8-9**.

| D-H...A       | d(H...A) | d(D...A) | ∠D-H...A |
|---------------|----------|----------|----------|
| <b>1</b>      |          |          |          |
| O3-H3B...O4#1 | 1.871    | 2.777(5) | 164.7(5) |
| O3-H3B...O5#2 | 2.032    | 2.735(5) | 131.2(4) |
| O4-H4...O1    | 1.564    | 2.383(5) | 175.4(6) |
| C10-H10...O2  | 2.274    | 3.071(5) | 143.5(5) |
| <b>3</b>      |          |          |          |
| O3-H3...O2#3  | 2.041(6) | 2.708(5) | 168.1(7) |
| C11-H11...O1  | 2.254(5) | 3.115(6) | 153.7(6) |
| <b>4</b>      |          |          |          |
| O3-H3B...O4#1 | 1.868    | 2.773(5) | 164.7(5) |
| O3-H3B...O5#2 | 2.030    | 2.732(5) | 131.2(4) |
| O4-H4...O1    | 1.548    | 2.380(5) | 175.4(6) |
| C10-H10...O2  | 2.269    | 3.063(5) | 143.0(5) |
| <b>6</b>      |          |          |          |
| O3-H3...O2#3  | 1.982(5) | 2.710(4) | 134.4(5) |
| C11-H11...O1  | 2.189(5) | 3.041(5) | 151.9(5) |

\*Symmetry transformation used to generate equivalent atoms: #1  $-x+1,-y+1,-z+1$ ; #2  $x-1,y-1,z$ ; #3  $-x+1,y+1/2,-z+1/2$ .



**Figure S1.** The thermal analyses (N<sub>2</sub>) of the crystalline **1-3** and **9** (TG curves).

**(a) Complex 1**

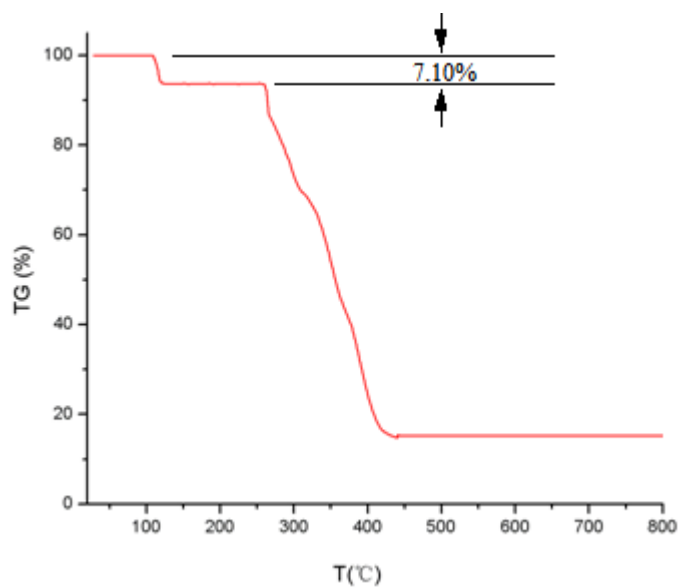

**(b) Complex 2**

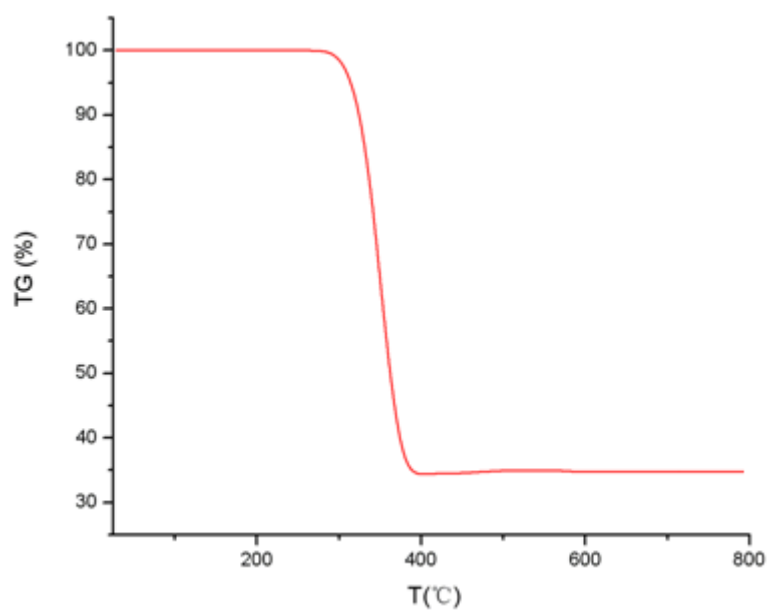

(c) Complex 3

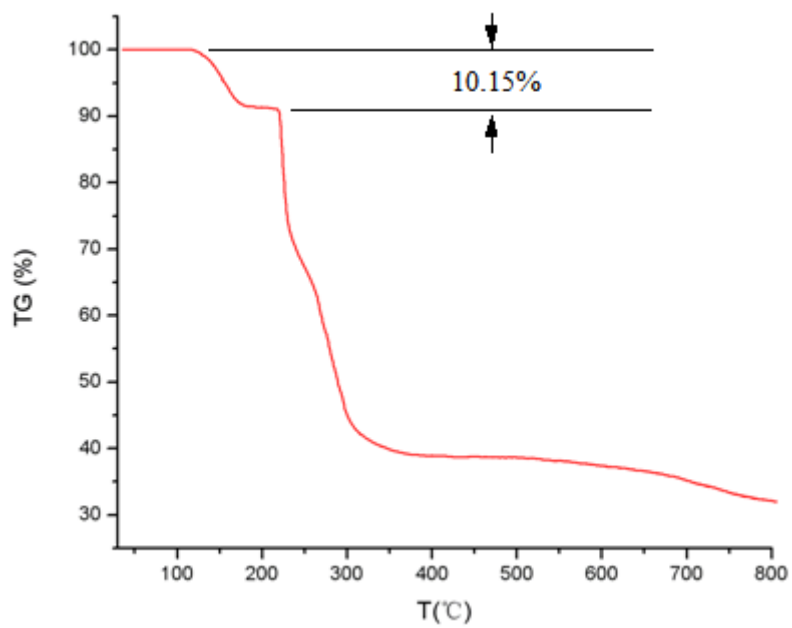

(d) Complex 9

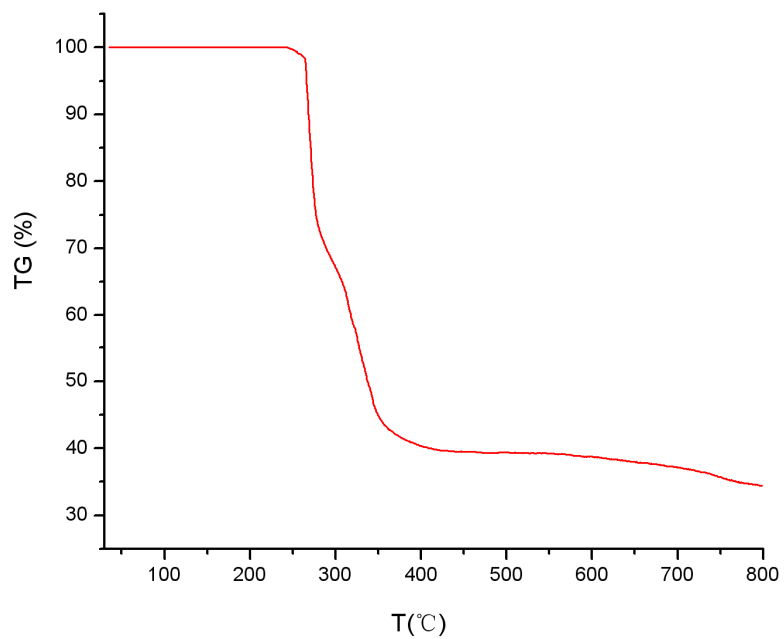

Figure S2 X-ray powder diffraction patterns of simulated (*a*) and as prepared complex (*b*)

for compounds **1**, **2**, **3** and **9**.

(1) for **1**.

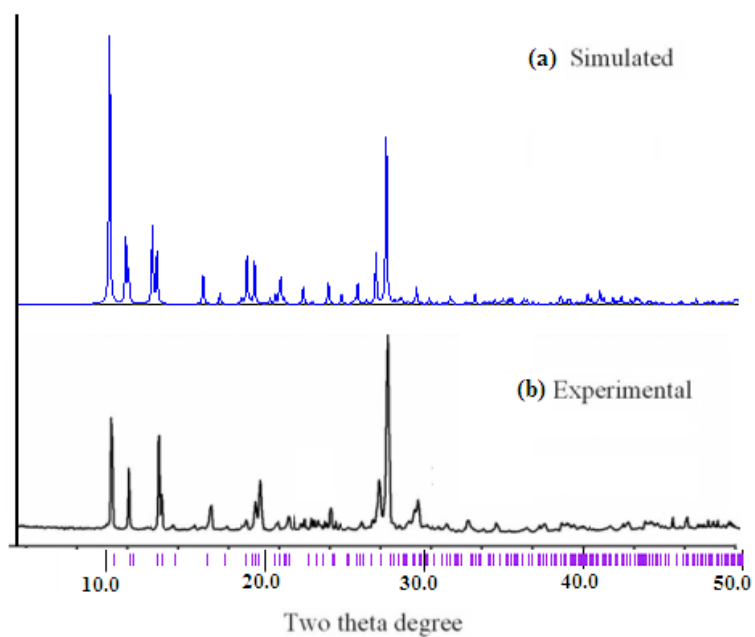

(2) for **2**

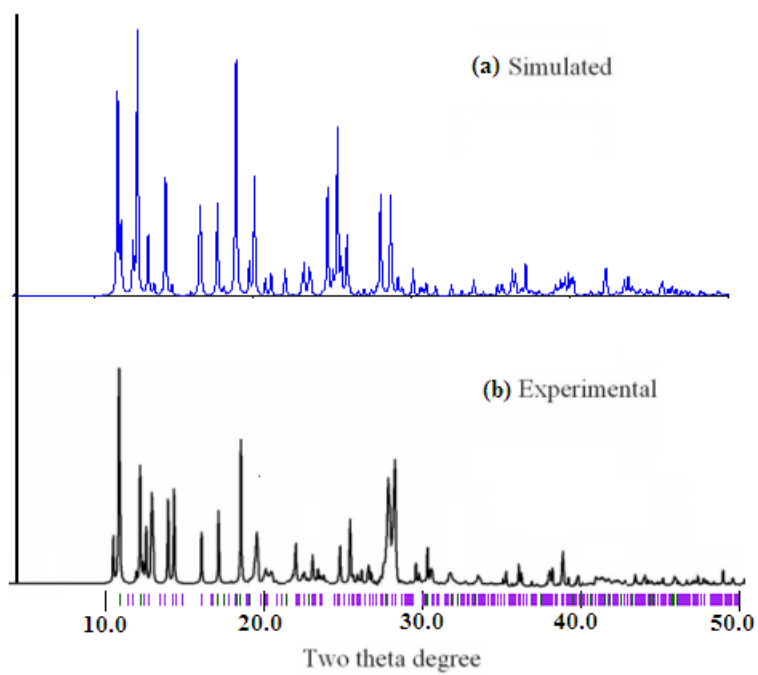

(3) for 3

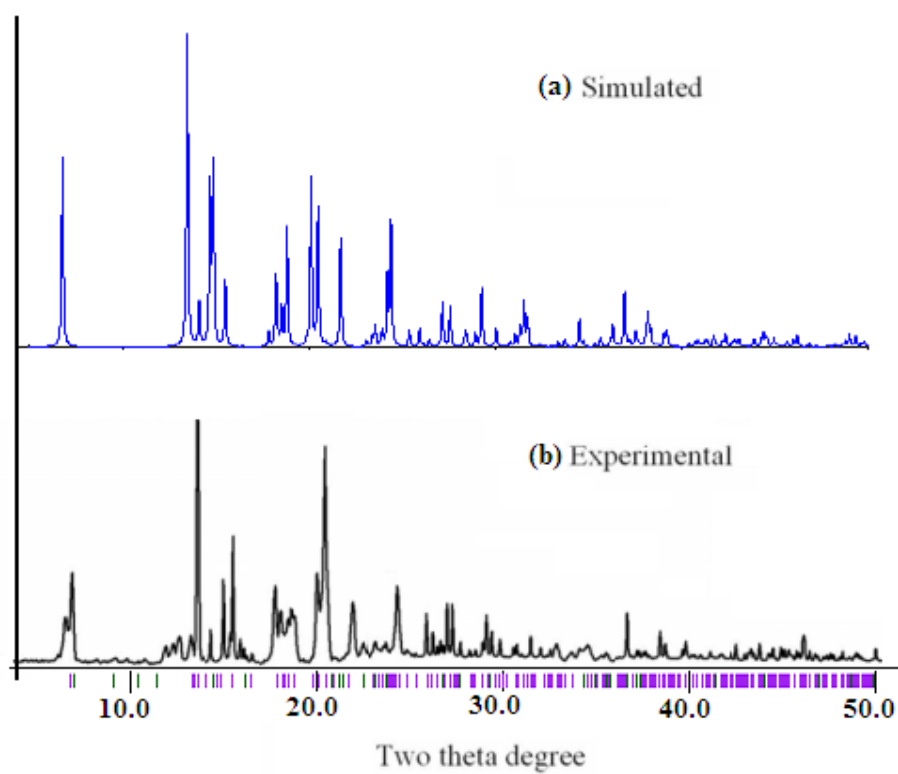

(4) for 9

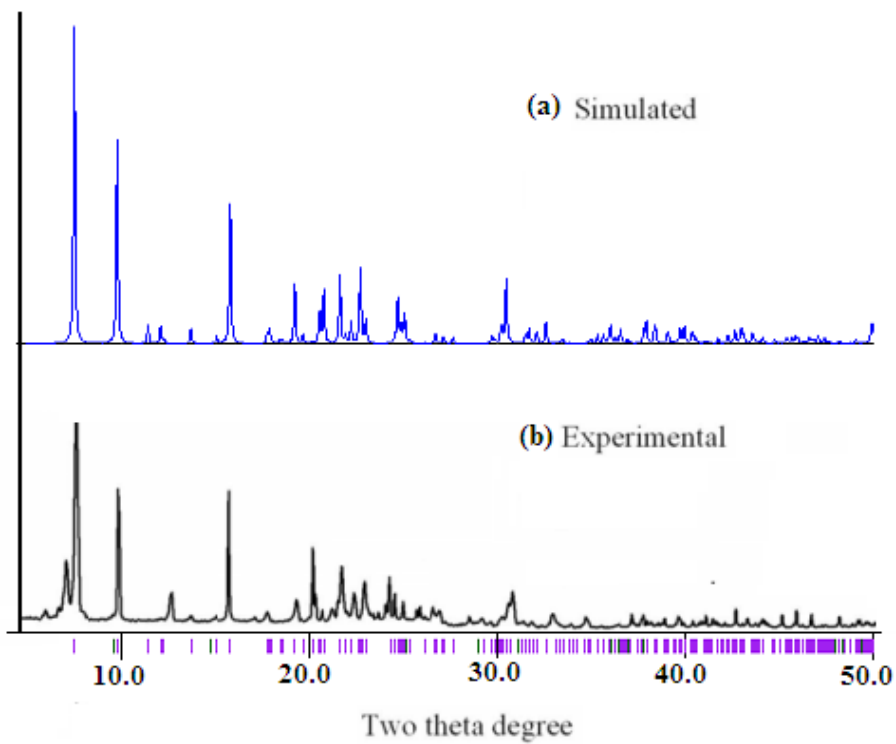

Supplement: c2dt31243c.pdf [file c2dt31243c.pdf]
